# Supplementary material for: SterylAcetyl Hydrolase 1 (BbSay1) Links Lipid Homeostasis to Conidiogenesis and Virulence in the Entomopathogenic Fungus Beauveria bassiana
Source: MDPI journal article supplement (doi:10.3390/jof8030292), 2022-03-11
Supplement: s1 [file s1]

**Table S3 Homologs of *B. bassiana* Say1-domain-containing proteins in other fungal species.**

| BBA <sup>*,#</sup> | AND <sup>†</sup> | ANI          | AFU      | CAL       | SCE      | YLI       | CMI      | MAC      | MRO      | MGR      |
|--------------------|------------------|--------------|----------|-----------|----------|-----------|----------|----------|----------|----------|
| BBA_02264          | EAA63899         | XP_003188637 | EAL91622 | XP_711433 | NA       | XP_504519 | EGX89271 | EFY91356 | EFZ00850 | EHA50963 |
| BBA_02415          | EAA65442         | XP_001400753 | EAL84910 | XP_711433 | NA       | NA        | EGX96126 | EFY93198 | EFZ01185 | EHA50640 |
| BBA_02633          | EAA61114         | XP_001401604 | EAL88803 | XP_721919 | NA       | NA        | EGX90144 | EFY86198 | NA       | EHA48364 |
| BBA_02920          | EAA64111         | XP_003188637 | EAL84910 | NA        | DAA08353 | XP_504519 | EGX96227 | EFY91058 | EFY96920 | EHA50640 |
|                    | 42.5%¶           | 44.3%        | 45.5%    |           | 14.9%    | 13.8%     | 78.4%    | 54.1%    | 54.9%    | 19.3%    |
| BBA_03865          | NA               | XP_001394739 | EAL88803 | XP_721834 | NA       | XP_504071 | EGX90887 | NA       | EFZ02604 | EHA48364 |
| BBA_04392          | EAA65442         | XP_001395501 | EAL84910 | XP_710482 | NA       | NA        | EGX90339 | EFY86198 | KHO11046 | EHA50640 |
| BBA_04927          | NA               | NA           | NA       | XP_721919 | NA       | NA        | NA       | NA       | NA       | NA       |
| BBA_07843          | EAA65442         | XP_001392749 | EAL87524 | XP_721919 | NA       | NA        | EGX96227 | EFY86198 | EFZ01185 | EHA50640 |
| BBA_08937          | EAA64111         | XP_003188637 | EAL84910 | NA        | NA       | NA        | EGX96227 | EFY91058 | EFZ03052 | EHA50640 |
| BBA_09015          | EAA65442         | XP_003188637 | EAL87524 | NA        | NA       | NA        | EGX96227 | EFY86198 | KHO11046 | EHA50640 |

\*: abbreviations for fungal species

BBA: *Beauveria bassiana*; AND: *Aspergillus nidulans*; ANI: *A. niger*; AFU: *A. fumigatus*; YLI: *Yarrowia lipolytica*; SCE: *Saccharomyces cerevisiae*; CAL: *Candida albicans*; MGR: *Magnaporthe grisea*; CMI: *Cordyceps militaris*; MRO: *Metarhizium robertsii*; MAC: *M. acridum*.

#: *B. bassiana* Say1-domain-containing proteins are indicated with their numbers of locus tag.

†: The homologs in other fungi are indicated with their accession numbers in GenBank.

¶: The amino acid identity (%) between BbSay1 and its orthologs in other fungi.

NA: No homolog of *B. bassiana* is present in the indicated fungal species.
