# Supplementary material for: SterylAcetyl Hydrolase 1 (BbSay1) Links Lipid Homeostasis to Conidiogenesis and Virulence in the Entomopathogenic Fungus Beauveria bassiana
Source: MDPI journal article supplement (doi:10.3390/jof8030292), 2022-03-11
Supplement: s1 [file s1]

**Table S2 Primers used for gene disruption and complementation of *BbSAY1* in *B. bassiana***

| Primer name     | Sequence (5'–3') <sup>a</sup>               | Purpose of use                             |
|-----------------|---------------------------------------------|--------------------------------------------|
| PL1             | TCAAACCCGGGGATATCATGGCAACCTCAACCCGAA        | Amplifying <i>BbSAY1</i>                   |
| PL2             | CTTGCTCACCATGTAACTTTCTGCAATTCAATCAG         |                                            |
| P <sub>1</sub>  | TGGGCCCCGGCGCGCCGAATTCCAGGATGCTGTGCCAGATAG  | Obtaining upstream flanking sequence       |
| P <sub>2</sub>  | TGGCTGCAGGTCGACGGATCCCTATTTACGAACGCCTCCTG   |                                            |
| P <sub>3</sub>  | GACCCATGGCTCGAGTCTAGACACGGAGCCCAAGGACAT     | Obtaining downstream flanking sequence     |
| P <sub>4</sub>  | GGTGGTGGTGGCTAGCGTTAACCGATCTTCCGCTCCGACT    |                                            |
| P <sub>5</sub>  | TCCGACTGTTGATTGTGCTG                        | Confirming the candidate transformants     |
| P <sub>6</sub>  | CATTCTTGTGCCCCACCC                          |                                            |
| P <sub>7</sub>  | ATCCGTCGACCTGCAGCCAAGCTTCGCTCCTCGAGATTCTGG  | Amplifying <i>Lip1</i> for complementation |
| P <sub>8</sub>  | ACACTAGAAGATCTGACTAGTGTGCTTGCCATCATCAATAAAC |                                            |
| P <sub>9</sub>  | GGGTGGGCAACAAGAATG                          | Probe preparing in Southern blot           |
| P <sub>10</sub> | GAGTCGCCGCCGAG                              |                                            |
