# Supplementary material for: SterylAcetyl Hydrolase 1 (BbSay1) Links Lipid Homeostasis to Conidiogenesis and Virulence in the Entomopathogenic Fungus Beauveria bassiana
Source: MDPI journal article supplement (doi:10.3390/jof8030292), 2022-03-11

**Figure S1 Bioinformatic and transcriptional analyses.** (A) Phylogenetic relationship of BbSay1 with its homologs in yeasts and other filamentous fungi. Relationships among proteins were depicted from Neighbor joining analysis and the bootstrap values > 50% from 1000 replicates are shown as numbers at each supported branch. (B) Expression profiles for the Say1-domain protein genes in *B. bassiana*. The wild-type strain was cultured on SDAY plate and sampled at 2, 3, 4, and 5 d. The relative expression levels were normalized to that at 2 d and shown in a heatmap.

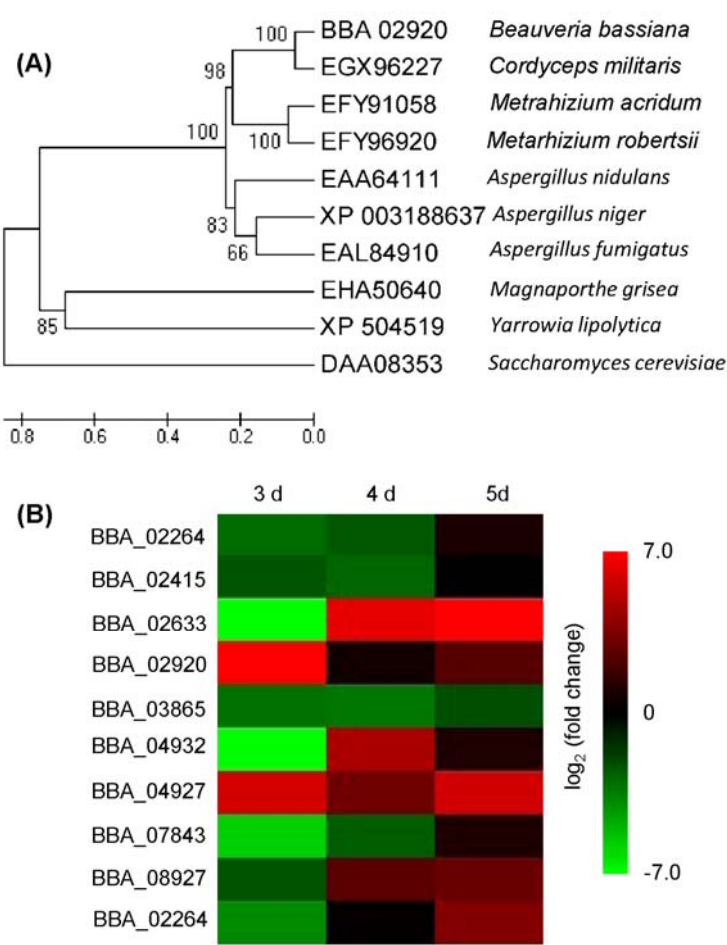

Supplement: s1 [file s1]
