# Supplementary material for: SterylAcetyl Hydrolase 1 (BbSay1) Links Lipid Homeostasis to Conidiogenesis and Virulence in the Entomopathogenic Fungus Beauveria bassiana
Source: MDPI journal article supplement (doi:10.3390/jof8030292), 2022-03-11
Supplement: s1 [file s1]

**Table S1 Primers for qRT-PCR analyses.**

| Primer name | Sequence (5'–3') <sup>a</sup> | Gene for qPCR |
|-------------|-------------------------------|---------------|
| P1F         | GTGTCTTTGGGGTAGAGGGC          | BBA_04392     |
| P1R         | CCTCCGTAATACCTGACCGC          |               |
| P2F         | GGTTGCCGCCATTATTCGTC          | BBA_03865     |
| P2R         | CGCATATTTCTGCGGGTTGG          |               |
| P3F         | TAAAGGCCGGTCATCCCAAC          | BBA_02920     |
| P3R         | TGCTCCGTCTCTGTGTTGTC          |               |
| P4F         | TTTGCGTCCTCACCTACAC           | BBA_02633     |
| P4R         | TGGAAGCGAACCCGCTTATT          |               |
| P5F         | GTTTCTTGCCGCGTGACATT          | BBA_02415     |
| P5R         | TCGTTGTTGCCAAAGATGCG          |               |
| P6F         | CCCGAGAAAACAGAGGGCAT          | BBA_02264     |
| P6R         | AAAACGTCAGCGAAACGACC          |               |
| P7F         | TATCGACGCTTCGTCTCTGC          | BBA_07843     |
| P7R         | GAAGCAGCTCCCCTCCAAAT          |               |
| P8F         | CAAACGCAACCTCCAAAGGG          | BBA_09015     |
| P8R         | TCTTGGATGAGGCTCTCGGA          |               |
| P9F         | TGGATCTCATCCCAGGAGCA          | BBA_08937     |
| P9R         | CAACGTGCGCTTTGTTGGTA          |               |
| P10F        | CCCACTATGGCGTGTATCCC          | BBA_04927     |
| P10R        | CAGGTCGAGCTGTCCAACAT          |               |
| 18Sf        | TGGTTTCTAGGACCGCCGTAA         | Reference     |
| 18Sr        | CCTTGGCAAATGCTTTTCGC          |               |
