# Supplementary material for: SterylAcetyl Hydrolase 1 (BbSay1) Links Lipid Homeostasis to Conidiogenesis and Virulence in the Entomopathogenic Fungus Beauveria bassiana
Source: MDPI journal article supplement (doi:10.3390/jof8030292), 2022-03-11

**Figure S2 Sub-cellular localization of Say1 in *B. bassiana*.** *BbSAY1* was fused to green fluorescent protein gene (*GFP*) and transformed into the wild-type strain. The resultant strain was cultured on SDAY plate and the fluorescent signals in mycelia were observed under a laser scanning confocal microscope. Bar: 5  $\mu$ m.

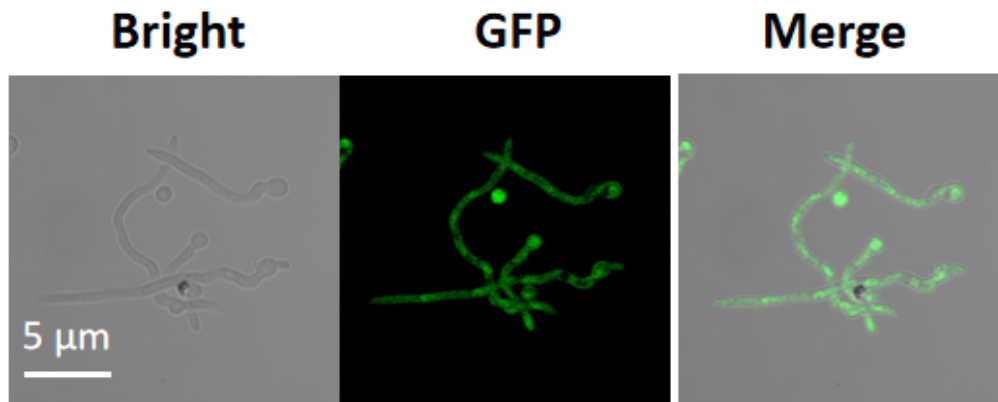

Supplement: s1 [file s1]
